# Supplementary material for: Life history strategy of Tubastraea spp. corals in an upwelling area on the Southwest Atlantic: growth, fecundity, settlement, and recruitment
Source: PeerJ. 2024 Jul 31;12:e17829. doi: 10.7717/peerj.17829 (PMC11297442; doi:10.7717/peerj.17829)
Supplement: Supplemental Information 3 [file peerj-12-17829-s003.xlsx]

## Sheet: Planilha1
Sp	Light	id	Growth
Ta	LL	1	4.67075
Ta	LL	2	6.751
Ta	LL	3	4.67075
Ta	LL	4	5.652
Ta	LL	5	4.98475
Ta	LL	6	5.06325
Ta	LL	7	3.6738
Ta	LL	8	5.14175
Ta	LL	9	2.8888
Ta	LL	10	3.0144
Ta	LL	11	4.01135
Ta	LL	12	4.0035
Ta	LL	13	4.8356
Ta	LL	14	4.7885
Ta	LL	15	5.69125
Ta	LL	16	4.0192
Ta	LL	17	3.57175
Ta	LL	18	4.3646
Ta	LL	19	4.3175
Ta	LL	20	3.1086
Ta	HL	21	2.8731
Ta	HL	22	5.28305
Ta	HL	23	5.0711
Ta	HL	24	5.966
Ta	HL	25	5.89535
Ta	HL	26	4.0035
Ta	HL	27	3.6424
Ta	HL	28	4.07415
Ta	HL	29	3.3755
Ta	HL	30	3.454
Ta	HL	31	4.1919
Ta	HL	32	4.1605
Ta	HL	33	4.5373
Ta	HL	34	4.5844
Ta	HL	35	4.8984
Ta	HL	36	4.1291
Ta	HL	37	3.14
Ta	HL	38	3.611
Ta	HL	39	3.65025
Ta	HL	40	4.3489
Tc	LL	41	6.0288
Tc	LL	42	5.11035
Tc	LL	43	4.3175
Tc	LL	44	5.4165
Tc	LL	45	5.36155
Tc	LL	46	5.2909
Tc	LL	47	3.7366
Tc	LL	48	5.62845
Tc	LL	49	4.74925
Tc	LL	50	4.9769
Tc	LL	51	4.5216
Tc	LL	52	4.9455
Tc	LL	53	4.90625
Tc	LL	54	4.867
Tc	LL	55	4.71
Tc	LL	56	5.181
Tc	LL	57	5.5735
Tc	LL	58	4.553
Tc	LL	59	4.27825
Tc	LL	60	4.3175
Tc	HL	61	4.239
Tc	HL	62	5.495
Tc	HL	63	5.2124
Tc	HL	64	6.8766
Tc	HL	65	6.79025
Tc	HL	66	3.0615
Tc	HL	67	3.88575
Tc	HL	68	4.6315
Tc	HL	69	3.17925
Tc	HL	70	4.7885
Tc	HL	71	5.44005
Tc	HL	72	4.4745
Tc	HL	73	4.9455
Tc	HL	74	5.45575
Tc	HL	75	3.88575
Tc	HL	76	4.3489
Tc	HL	77	5.61275
Tc	HL	78	3.1086
Tc	HL	79	4.239
Tc	HL	80	5.652
Ts	LL	81	-3.65025
Ts	LL	82	4.71
Ts	LL	83	6.28
Ts	LL	84	3.1243
Ts	LL	85	7.9913
Ts	LL	86	7.85
Ts	LL	87	6.437
Ts	LL	88	4.04275
Ts	LL	89	4.3332
Ts	LL	90	3.9564
Ts	LL	91	5.31445
Ts	LL	92	5.9346
Ts	LL	93	4.0506
Ts	LL	94	4.1134
Ts	LL	95	8.3367
Ts	LL	96	5.4322
Ts	LL	97	4.4745
Ts	LL	98	4.54515
Ts	LL	99	7.8186
Ts	LL	100	1.2874
Ts	HL	101	5.07895
Ts	HL	102	6.3114
Ts	HL	103	6.30355
Ts	HL	104	4.8984
Ts	HL	105	5.2438
Ts	HL	106	3.5325
Ts	HL	107	3.41475
Ts	HL	108	5.12605
Ts	HL	109	4.867
Ts	HL	110	4.8042
Ts	HL	111	4.396
Ts	HL	112	6.0602
Ts	HL	113	5.8404
Ts	HL	114	3.16355
Ts	HL	115	5.7776
Ts	HL	116	7.222
Ts	HL	117	6.00525
Ts	HL	118	4.3646
Ts	HL	119	6.31925
Ts	HL	120	4.7257
Ta - Tubastraea aurea
Tc - Tubastraea coccinea
Ts - Tubastraea sp.
HL - High light
LL - Low light
