# Supplementary material for: Life history strategy of Tubastraea spp. corals in an upwelling area on the Southwest Atlantic: growth, fecundity, settlement, and recruitment
Source: PeerJ. 2024 Jul 31;12:e17829. doi: 10.7717/peerj.17829 (PMC11297442; doi:10.7717/peerj.17829)
Supplement: Supplemental Information 4 [file peerj-12-17829-s004.xlsx]

## Sheet: Planilha1
id	polip	time	sp	area	oocyte III	fecundity
1	1	0	Ta	4.70504	236	50.159
1	2	0	Ta	3.87175	330	85.2328
2	1	0	Ta	6.19608	90	14.5253
2	2	0	Ta	4.85144	297	61.2189
3	1	0	Ta	3.718	291	78.2678
3	2	0	Ta	7.01769	68	9.6898
4	1	0	Tc	5.81337	144	24.7705
4	2	0	Tc	3.38761	40	11.8077
5	1	0	Tc	3.11897	105	33.6649
5	2	0	Tc	2.826	22	7.78485
6	1	0	Tc	3.36	147	43.75
6	2	0	Tc	3.14	94	29.9363
7	1	0	Ts	3.709	190	51.2268
7	2	0	Ts	4.48034	230	51.3354
8	1	0	Ts	5.09607	82	16.0908
8	2	0	Ts	2.81835	198	70.2539
9	1	0	Ts	4.48034	55	12.2759
9	2	0	Ts	5.42658	39	7.18685
1	1	1	Ta	3.709	134	36.1283
1	2	1	Ta	5.4252	140	25.8055
2	1	1	Ta	2.97176	225	75.7128
2	2	1	Ta	4.88424	325	66.5405
3	1	1	Ta	3.1	210	67.7419
3	2	1	Ta	2.66	295	110.902
4	1	1	Tc	2.18533	43	19.6767
4	2	1	Tc	2.68204	14	5.21991
5	1	1	Tc	3.709	11	2.96576
5	2	1	Tc	1.89539	11	5.80355
6	1	1	Tc	5.04133	47	9.32294
6	2	1	Tc	2.33116	15	6.43455
7	1	1	Ts	3.67051	101	27.5166
7	2	1	Ts	3.718	93	25.0134
8	1	1	Ts	3.62953	136	37.4704
8	2	1	Ts	3.26739	23	7.03926
9	1	1	Ts	3.87175	128	33.06
9	2	1	Ts	3.79851	212	55.8114
1	1	2	Ta	4.68758	95	20.2663
1	2	2	Ta	3.82788	67	17.5032
2	1	2	Ta	5.4252	79	14.5617
2	2	2	Ta	4.52683	291	64.2834
3	1	2	Ta	4.43815	118	26.5877
3	2	2	Ta	4.34978	140	32.1855
4	1	2	Tc	3.11897	12	3.84742
4	2	2	Tc	2.57969	26	10.0787
5	1	2	Tc	4.20033	151	35.9496
5	2	2	Tc	2.71373	69	25.4263
6	1	2	Tc	2.97176	7	2.35551
6	2	2	Tc	2.44675	36	14.7134
7	1	2	Ts	6.52535	51	7.81567
7	2	2	Ts	4.02164	78	19.3951
8	1	2	Ts	5.79116	108	18.6491
8	2	2	Ts	6.10669	182	29.8034
9	1	2	Ts	4.6	80	17.3913
9	2	2	Ts	5.2	130	25
1	1	3	Ta	5.81337	146	25.1145
1	2	3	Ta	4.34978	285	65.5205
2	1	3	Ta	5.42658	342	63.0231
2	2	3	Ta	4.70504	347	73.7507
3	1	3	Ta	6.19608	224	36.1519
3	2	3	Ta	4.72485	241	51.0069
4	1	3	Tc	2.826	65	23.0007
4	2	3	Tc	2.09614	40	19.0827
5	1	3	Tc	2.47047	49	19.8343
5	2	3	Tc	2.06062	0	0
6	1	3	Tc	3.11897	26	8.33608
6	2	3	Tc	3.65805	51	13.9418
7	1	3	Ts	4.69887	55	11.7049
7	2	3	Ts	3.5325	82	23.213
8	1	3	Ts	5.42658	232	42.7525
8	2	3	Ts	4.27416	186	43.5173
9	1	3	Ts	5.09607	221	43.3667
9	2	3	Ts	5.79116	503	86.8565
1	1	4	Ta	6.14205	45	7.32654
1	2	4	Ta	4.34978	213	48.968
2	1	4	Ta	6.30309	342	54.2591
2	2	4	Ta	6.00873	286	47.5974
3	1	4	Ta	4.6	242	52.6087
3	2	4	Ta	3.4	115	33.8235
4	1	4	Tc	6.09365	98	16.0823
4	2	4	Tc	5.79116	62	10.706
5	1	4	Tc	2.71373	137	50.484
5	2	4	Tc	2.47047	36	14.5721
6	1	4	Tc	2.71373	134	49.3786
6	2	4	Tc	2.20329	62	28.1398
7	1	4	Ts	5.79116	232	40.0611
7	2	4	Ts	3.32612	198	59.5288
8	1	4	Ts	5.70851	220	38.5389
8	2	4	Ts	5.60862	128	22.822
9	1	4	Ts	4.78773	175	36.5518
9	2	4	Ts	5.03394	167	33.1748
1	1	5	Ta	8.12672	179	22.0261
1	2	5	Ta	6.5032	191	29.3701
2	1	5	Ta	4.23542	151	35.6517
2	2	5	Ta	4.90159	146	29.7863
3	1	5	Ta	5.92768	235	39.6445
3	2	5	Ta	4.43815	336	75.7073
4	1	5	Tc	2.68204	256	95.4498
4	2	5	Tc	2.65477	194	73.076
5	1	5	Tc	3.86956	223	57.6293
5	2	5	Tc	3.4168	65	19.0237
6	1	5	Tc	9.06454	94	10.3701
6	2	5	Tc	2.51965	69	27.3847
7	1	5	Ts	3.34113	136	40.7048
7	2	5	Ts	3.5325	209	59.1649
8	1	5	Ts	3.718	344	92.5228
8	2	5	Ts	4.70876	270	57.3399
9	1	5	Ts	2.84867	395	138.661
9	2	5	Ts	3.56705	66	18.5027
1	1	6	Ta	6.72922	336	49.9315
1	2	6	Ta	4.477	448	100.067
2	1	6	Ta	5.85776	185	31.5821
2	2	6	Ta	7.42061	269	36.2504
3	1	6	Ta	7.46345	549	73.5585
3	2	6	Ta	10.4435	336	32.1733
4	1	6	Tc	2.826	235	83.1564
4	2	6	Tc	2.31518	191	82.4989
5	1	6	Tc	4.88424	213	43.6096
5	2	6	Tc	2.97176	151	50.8117
6	1	6	Tc	5.06431	202	39.887
6	2	6	Tc	4.52683	79	17.4515
7	1	6	Ts	4.02164	136	33.8171
7	2	6	Ts	2.7764	124	44.6621
8	1	6	Ts	4.53207	120	26.4779
8	2	6	Ts	4.02164	170	42.2713
9	1	6	Ts	5.20209	248	47.6731
9	2	6	Ts	3.67051	116	31.6032
1	1	7	Ta	5.81337	325	55.9056
1	2	7	Ta	5.78364	336	58.0949
2	1	7	Ta	3.11897	246	78.8721
2	2	7	Ta	1.97251	442	224.08
3	1	7	Ta	5.4252	392	72.2554
3	2	7	Ta	3.87175	490	126.558
4	1	7	Tc	3.82788	151	39.4474
4	2	7	Tc	3.709	242	65.2467
5	1	7	Tc	3.11897	241	77.269
5	2	7	Tc	1.97251	14	7.09755
6	1	7	Tc	4.52683	22	4.85991
6	2	7	Tc	2.71373	350	128.974
7	1	7	Ts	3.366	114	33.8681
7	2	7	Ts	6.89433	258	37.422
8	1	7	Ts	4.9418	738	149.338
8	2	7	Ts	4.17416	23	5.51009
9	1	7	Ts	3.9	97	24.8718
9	2	7	Ts	4.3	291	67.6744
1	1	8	Ta	6.59879	190	28.7931
1	2	8	Ta	3.67051	291	79.2805
2	1	8	Ta	5.23265	386	73.7676
2	2	8	Ta	4.88424	146	29.892
3	1	8	Ta	5.85776	448	76.4798
3	2	8	Ta	5.17694	218	42.1098
4	1	8	Tc	5.06431	350	69.1111
4	2	8	Tc	2.68204	302	112.601
5	1	8	Tc	4.53207	302	66.6362
5	2	8	Tc	4.62226	177	38.2929
6	1	8	Tc	2.05765	0	0
6	2	8	Tc	1.91365	0	0
7	1	8	Ts	5.70851	568	99.5006
7	2	8	Ts	4.32708	46	10.6307
8	1	8	Ts	4.86618	31	6.3705
8	2	8	Ts	3.80881	240	63.0117
9	1	8	Ts	3.39482	93	27.3947
9	2	8	Ts	3.25753	386	118.495
1	1	9	Ta	9.3516	286	30.583
1	2	9	Ta	5.04133	269	53.359
2	1	9	Ta	6.94004	162	23.3428
2	2	9	Ta	5.37724	62	11.5301
3	1	9	Ta	5.71571	196	34.2915
3	2	9	Ta	4.34978	210	48.2783
4	1	9	Tc	3.95354	173	43.7583
4	2	9	Tc	3.56705	220	61.6757
5	1	9	Tc	4.11207	22	5.3501
5	2	9	Tc	3.82788	50	13.0621
6	1	9	Tc	2.97176	220	74.0303
6	2	9	Tc	3.54754	223	62.8605
7	1	9	Ts	6.09365	329	53.9906
7	2	9	Ts	4.48034	162	36.158
8	1	9	Ts	4.79453	240	50.0571
8	2	9	Ts	3.18904	344	107.869
9	1	9	Ts	3.84704	178	46.2693
9	2	9	Ts	3.86956	194	50.1349
1	1	10	Ta	6.43252	80	12.4368
1	2	10	Ta	6.5032	77	11.8403
2	1	10	Ta	7.42061	127	17.1145
2	2	10	Ta	6.25004	152	24.3199
3	1	10	Ta	7.10559	216	30.3986
3	2	10	Ta	4.88424	255	52.2087
4	1	10	Tc	1.35665	113	83.2937
4	2	10	Tc	3.11897	88	28.2144
5	1	10	Tc	4.20033	117	27.855
5	2	10	Tc	3.709	122	32.893
6	1	10	Tc	2.68204	133	49.5892
6	2	10	Tc	2.35967	159	67.3823
7	1	10	Ts	3.86956	202	52.2023
7	2	10	Ts	3.5325	232	65.6759
8	1	10	Ts	3.4168	242	70.8265
8	2	10	Ts	1.86422	268	143.76
9	1	10	Ts	5.79116	233	40.2337
9	2	10	Ts	4.25058	121	28.4667
1	1	11	Ta	6.25004	58	9.27995
1	2	11	Ta	7.42061	79	10.646
2	1	11	Ta	5.61882	155	27.5859
2	2	11	Ta	5.99463	43	7.17308
3	1	11	Ta	3.4168	167	48.8761
3	2	11	Ta	2.57969	89	34.5003
4	1	11	Tc	3.4168	105	30.7305
4	2	11	Tc	4.03558	205	50.7982
5	1	11	Tc	4.11498	289	70.2311
5	2	11	Tc	4.20033	269	64.0426
6	1	11	Tc	5.15463	305	59.1702
6	2	11	Tc	2.98436	115	38.5342
7	1	11	Ts	4.78773	210	43.8621
7	2	11	Ts	5.24512	163	31.0765
8	1	11	Ts	4.86618	284	58.362
8	2	11	Ts	4.53207	149	32.8768
9	1	11	Ts	4.66323	112	24.0177
9	2	11	Ts	5.37724	199	37.0078
