# Supplementary material for: Life history strategy of Tubastraea spp. corals in an upwelling area on the Southwest Atlantic: growth, fecundity, settlement, and recruitment
Source: PeerJ. 2024 Jul 31;12:e17829. doi: 10.7717/peerj.17829 (PMC11297442; doi:10.7717/peerj.17829)
Supplement: Supplemental Information 5 [file peerj-12-17829-s005.xlsx]

## Sheet: Planilha1
id	Time	Sp	Light	Area	N polyp	Increment
1	0	Ta	LL	3.297	6	0
2	0	Ta	LL	1.76625	7	0
3	0	Ta	LL	1.413	6	0
4	0	Ta	LL	1.9782	6	0
5	0	Ta	LL	1.4915	5	0
6	0	Ta	LL	24.7275	6	0
7	0	Ta	LL	24.492	8	0
8	0	Ta	LL	30.5208	6	0
9	0	Ta	LL	14.915	10	0
10	0	Ta	LL	25.9992	13	0
11	0	Ta	LL	23.6128	12	0
12	0	Ta	LL	21.9015	10	0
13	0	Ta	LL	30.772	10	0
14	0	Ta	LL	18.84	18	0
15	0	Ta	LL	17.27	21	0
16	0	Ta	LL	29.8928	6	0
17	0	Ta	LL	22.765	5	0
18	0	Ta	LL	26.1562	8	0
19	0	Ta	LL	21.195	5	0
20	0	Ta	LL	15.386	4	0
21	0	Ta	HL	1.413	5	0
22	0	Ta	HL	2.47275	4	0
23	0	Ta	HL	2.0724	6	0
24	0	Ta	HL	4.396	6	0
25	0	Ta	HL	6.0288	9	0
26	0	Ta	HL	14.8365	9	0
27	0	Ta	HL	24.335	6	0
28	0	Ta	HL	23.2674	8	0
29	0	Ta	HL	13.4628	14	0
30	0	Ta	HL	16.328	22	0
31	0	Ta	HL	21.195	28	0
32	0	Ta	HL	15.7	14	0
33	0	Ta	HL	19.1383	8	0
34	0	Ta	HL	25.3084	16	0
35	0	Ta	HL	15.072	12	0
36	0	Ta	HL	24.9159	5	0
37	0	Ta	HL	14.13	6	0
38	0	Ta	HL	22.9534	5	0
39	0	Ta	HL	14.2477	6	0
40	0	Ta	HL	22.6551	7	0
41	0	Tc	LL	2.2608	8	0
42	0	Tc	LL	1.2089	6	0
43	0	Tc	LL	1.1775	6	0
44	0	Tc	LL	1.884	8	0
45	0	Tc	LL	1.6956	9	0
46	0	Tc	LL	18.6516	8	0
47	0	Tc	LL	16.6734	9	0
48	0	Tc	LL	22.451	7	0
49	0	Tc	LL	18.212	12	0
50	0	Tc	LL	34.2888	15	0
51	0	Tc	LL	28.8252	14	0
52	0	Tc	LL	11.5395	11	0
53	0	Tc	LL	28.0638	9	0
54	0	Tc	LL	9.42	16	0
55	0	Tc	LL	15.072	22	0
56	0	Tc	LL	30.4266	6	0
57	0	Tc	LL	28.574	6	0
58	0	Tc	LL	19.782	7	0
59	0	Tc	LL	17.27	8	0
60	0	Tc	LL	25.905	9	0
61	0	Tc	HL	2.1195	8	0
62	0	Tc	HL	2.512	8	0
63	0	Tc	HL	1.57	8	0
64	0	Tc	HL	3.14	10	0
65	0	Tc	HL	4.4745	6	0
66	0	Tc	HL	16.014	5	0
67	0	Tc	HL	22.137	7	0
68	0	Tc	HL	31.7925	8	0
69	0	Tc	HL	13.4628	15	0
70	0	Tc	HL	9.8125	20	0
71	0	Tc	HL	15.4802	22	0
72	0	Tc	HL	13.7375	20	0
73	0	Tc	HL	13.4235	9	0
74	0	Tc	HL	22.608	18	0
75	0	Tc	HL	22.137	13	0
76	0	Tc	HL	22.9534	8	0
77	0	Tc	HL	30.615	8	0
78	0	Tc	HL	6.86875	10	0
79	0	Tc	HL	20.3472	6	0
80	0	Tc	HL	31.086	5	0
81	0	Ts	LL	12.3638	3	0
82	0	Ts	LL	3.768	5	0
83	0	Ts	LL	4.71	7	0
84	0	Ts	LL	7.4732	6	0
85	0	Ts	LL	7.4575	6	0
86	0	Ts	LL	27.475	3	0
87	0	Ts	LL	13.345	5	0
88	0	Ts	LL	9.42	7	0
89	0	Ts	LL	13.5648	6	0
90	0	Ts	LL	24.6176	6	0
91	0	Ts	LL	14.3184	8	0
92	0	Ts	LL	11.8692	9	0
93	0	Ts	LL	12.2774	15	0
94	0	Ts	LL	20.41	12	0
95	0	Ts	LL	11.775	6	0
96	0	Ts	LL	28.6368	12	0
97	0	Ts	LL	16.014	13	0
98	0	Ts	LL	23.6207	6	0
99	0	Ts	LL	25.8579	18	0
100	0	Ts	LL	33.0956	19	0
101	0	Ts	HL	3.925	3	0
102	0	Ts	HL	2.6376	5	0
103	0	Ts	HL	5.23595	7	0
104	0	Ts	HL	4.5216	6	0
105	0	Ts	HL	12.8112	6	0
106	0	Ts	HL	14.13	3	0
107	0	Ts	HL	10.7153	5	0
108	0	Ts	HL	24.5469	7	0
109	0	Ts	HL	16.485	6	0
110	0	Ts	HL	16.5478	6	0
111	0	Ts	HL	11.0528	8	0
112	0	Ts	HL	16.5478	9	0
113	0	Ts	HL	26.69	14	0
114	0	Ts	HL	13.3843	12	0
115	0	Ts	HL	31.2116	6	0
116	0	Ts	HL	21.98	12	0
117	0	Ts	HL	8.83125	13	0
118	0	Ts	HL	18.0864	6	0
119	0	Ts	HL	17.8588	18	0
120	0	Ts	HL	10.5975	20	0
1	1	Ta	LL	4.3332	6	0
2	1	Ta	LL	1.1775	8	1
3	1	Ta	LL	1.3345	6	0
4	1	Ta	LL	2.3864	7	1
5	1	Ta	LL	1.81335	8	3
6	1	Ta	LL	25.7166	6	0
7	1	Ta	LL	24.6176	10	2
8	1	Ta	LL	31.086	7	1
9	1	Ta	LL	12.246	11	1
10	1	Ta	LL	26.3603	13	0
11	1	Ta	LL	23.9818	12	0
12	1	Ta	LL	22.7493	11	1
13	1	Ta	LL	32.185	11	1
14	1	Ta	LL	19.468	19	1
15	1	Ta	LL	19.4523	22	1
16	1	Ta	LL	30.3324	8	2
17	1	Ta	LL	24.0838	6	1
18	1	Ta	LL	26.5409	8	0
19	1	Ta	LL	22.0271	7	2
20	1	Ta	LL	15.8256	8	4
21	1	Ta	HL	2.00175	6	1
22	1	Ta	HL	3.3912	5	1
23	1	Ta	HL	2.2608	6	0
24	1	Ta	HL	4.9455	6	0
25	1	Ta	HL	6.86875	9	0
26	1	Ta	HL	16.2495	10	1
27	1	Ta	HL	25.222	8	2
28	1	Ta	HL	21.7602	7	-1
29	1	Ta	HL	12.9525	15	1
30	1	Ta	HL	17.8038	24	2
31	1	Ta	HL	21.9015	28	0
32	1	Ta	HL	16.8147	15	1
33	1	Ta	HL	20.724	9	1
34	1	Ta	HL	27.0432	18	2
35	1	Ta	HL	16.0925	15	3
36	1	Ta	HL	25.277	6	1
37	1	Ta	HL	14.6952	6	0
38	1	Ta	HL	21.98	6	1
39	1	Ta	HL	15.386	6	0
40	1	Ta	HL	23.236	9	2
41	1	Tc	LL	3.14	10	2
42	1	Tc	LL	1.5386	11	5
43	1	Tc	LL	2.3864	9	3
44	1	Tc	LL	2.826	10	2
45	1	Tc	LL	2.355	11	2
46	1	Tc	LL	19.782	10	2
47	1	Tc	LL	16.956	9	0
48	1	Tc	LL	24.021	10	3
49	1	Tc	LL	18.84	12	0
50	1	Tc	LL	34.7284	16	1
51	1	Tc	LL	29.7908	15	1
52	1	Tc	LL	11.304	14	3
53	1	Tc	LL	29.0136	14	5
54	1	Tc	LL	10.1265	23	7
55	1	Tc	LL	15.9355	23	1
56	1	Tc	LL	31.9574	11	5
57	1	Tc	LL	29.5395	10	4
58	1	Tc	LL	20.5827	9	2
59	1	Tc	LL	18.0236	7	-1
60	1	Tc	LL	26.9412	6	-3
61	1	Tc	HL	1.6956	9	1
62	1	Tc	HL	4.396	9	1
63	1	Tc	HL	2.041	11	3
64	1	Tc	HL	3.6424	8	-2
65	1	Tc	HL	5.0711	8	2
66	1	Tc	HL	16.014	11	6
67	1	Tc	HL	22.8749	8	1
68	1	Tc	HL	32.2164	5	-3
69	1	Tc	HL	13.345	12	-3
70	1	Tc	HL	11.4296	26	6
71	1	Tc	HL	16.485	28	6
72	1	Tc	HL	14.287	14	-6
73	1	Tc	HL	14.0201	9	0
74	1	Tc	HL	24.335	19	1
75	1	Tc	HL	22.8749	17	4
76	1	Tc	HL	23.6285	8	0
77	1	Tc	HL	31.557	9	1
78	1	Tc	HL	7.3476	7	-3
79	1	Tc	HL	21.195	6	0
80	1	Tc	HL	32.6639	11	6
81	1	Ts	LL	4.4902	4	1
82	1	Ts	LL	4.1762	3	-2
83	1	Ts	LL	4.02705	7	0
84	1	Ts	LL	4.7885	7	1
85	1	Ts	LL	8.2425	7	1
86	1	Ts	LL	22.451	4	1
87	1	Ts	LL	14.6952	3	-2
88	1	Ts	LL	9.891	7	0
89	1	Ts	LL	13.816	8	2
90	1	Ts	LL	26.2975	6	0
91	1	Ts	LL	14.5068	8	0
92	1	Ts	LL	12.8112	8	-1
93	1	Ts	LL	13.7375	9	-6
94	1	Ts	LL	20.4414	13	1
95	1	Ts	LL	13.0624	8	2
96	1	Ts	LL	32.1222	12	0
97	1	Ts	LL	16.956	12	-1
98	1	Ts	LL	24.335	7	1
99	1	Ts	LL	26.847	19	1
100	1	Ts	LL	26.3367	20	1
101	1	Ts	HL	4.4902	5	2
102	1	Ts	HL	3.925	3	-2
103	1	Ts	HL	2.983	7	0
104	1	Ts	HL	6.31925	8	2
105	1	Ts	HL	16.642	6	0
106	1	Ts	HL	14.8051	4	1
107	1	Ts	HL	11.5866	3	-2
108	1	Ts	HL	23.55	7	0
109	1	Ts	HL	14.915	6	0
110	1	Ts	HL	16.8147	6	0
111	1	Ts	HL	8.478	8	0
112	1	Ts	HL	16.485	8	-1
113	1	Ts	HL	28.574	9	-5
114	1	Ts	HL	13.659	13	1
115	1	Ts	HL	25.9521	7	1
116	1	Ts	HL	23.2203	12	0
117	1	Ts	HL	10.5504	12	-1
118	1	Ts	HL	15.7	7	1
119	1	Ts	HL	11.3825	18	0
120	1	Ts	HL	9.8125	20	0
1	2	Ta	LL	4.12125	8	2
2	2	Ta	LL	3.768	10	2
3	2	Ta	LL	1.1775	10	4
4	2	Ta	LL	4.8984	11	4
5	2	Ta	LL	2.94375	8	0
6	2	Ta	LL	26.6272	7	1
7	2	Ta	LL	25.905	11	1
8	2	Ta	LL	32.5304	7	0
9	2	Ta	LL	15.5116	16	5
10	2	Ta	LL	27.3023	14	1
11	2	Ta	LL	24.492	13	1
12	2	Ta	LL	24.1152	13	2
13	2	Ta	LL	33.4724	11	0
14	2	Ta	LL	20.2766	19	0
15	2	Ta	LL	20.9281	24	2
16	2	Ta	LL	31.3215	7	-1
17	2	Ta	LL	24.963	10	4
18	2	Ta	LL	28.0245	9	1
19	2	Ta	LL	23.3616	10	3
20	2	Ta	LL	16.3908	8	0
21	2	Ta	HL	2.6376	9	3
22	2	Ta	HL	2.669	7	2
23	2	Ta	HL	4.4745	8	2
24	2	Ta	HL	4.239	7	1
25	2	Ta	HL	6.28	11	2
26	2	Ta	HL	16.9717	10	0
27	2	Ta	HL	26.6272	8	0
28	2	Ta	HL	24.806	10	3
29	2	Ta	HL	14.4126	16	1
30	2	Ta	HL	18.5652	26	2
31	2	Ta	HL	22.7493	28	0
32	2	Ta	HL	17.215	16	1
33	2	Ta	HL	21.5404	11	2
34	2	Ta	HL	28.4955	18	0
35	2	Ta	HL	16.485	15	0
36	2	Ta	HL	26.1954	9	3
37	2	Ta	HL	15.3939	9	3
38	2	Ta	HL	23.6285	6	0
39	2	Ta	HL	15.9355	8	2
40	2	Ta	HL	23.55	10	1
41	2	Tc	LL	3.2813	11	1
42	2	Tc	LL	2.6376	11	0
43	2	Tc	LL	2.1195	11	2
44	2	Tc	LL	2.70825	12	2
45	2	Tc	LL	3.768	14	3
46	2	Tc	LL	21.8544	10	0
47	2	Tc	LL	17.5212	11	2
48	2	Tc	LL	25.4576	9	-1
49	2	Tc	LL	20.1117	13	1
50	2	Tc	LL	35.796	16	0
51	2	Tc	LL	31.3215	15	0
52	2	Tc	LL	14.13	14	0
53	2	Tc	LL	30.0498	10	-4
54	2	Tc	LL	11.1941	23	0
55	2	Tc	LL	17.898	25	2
56	2	Tc	LL	32.4205	11	0
57	2	Tc	LL	32.0908	10	0
58	2	Tc	LL	21.3049	9	0
59	2	Tc	LL	19.1226	9	2
60	2	Tc	LL	27.8754	10	4
61	2	Tc	HL	1.57	10	1
62	2	Tc	HL	5.8875	9	0
63	2	Tc	HL	3.1871	16	5
64	2	Tc	HL	4.3175	8	0
65	2	Tc	HL	5.3537	9	1
66	2	Tc	HL	17.1444	6	-5
67	2	Tc	HL	24.233	7	-1
68	2	Tc	HL	33.2448	7	2
69	2	Tc	HL	13.7375	13	1
70	2	Tc	HL	11.8692	26	0
71	2	Tc	HL	17.2386	28	0
72	2	Tc	HL	14.9778	14	0
73	2	Tc	HL	15.4488	14	5
74	2	Tc	HL	25.7166	19	0
75	2	Tc	HL	23.3616	17	0
76	2	Tc	HL	24.5234	8	0
77	2	Tc	HL	33.0956	9	0
78	2	Tc	HL	8.3524	8	1
79	2	Tc	HL	21.5875	6	0
80	2	Tc	HL	33.1113	11	0
81	2	Ts	LL	5.69125	5	1
82	2	Ts	LL	5.3537	7	4
83	2	Ts	LL	7.51245	10	3
84	2	Ts	LL	7.26125	8	1
85	2	Ts	LL	10.2207	7	0
86	2	Ts	LL	23.55	5	1
87	2	Ts	LL	16.8382	7	4
88	2	Ts	LL	12.0105	10	3
89	2	Ts	LL	13.345	8	0
90	2	Ts	LL	28.1658	8	2
91	2	Ts	LL	16.6734	9	1
92	2	Ts	LL	15.3075	9	1
93	2	Ts	LL	14.915	15	6
94	2	Ts	LL	23.6285	15	2
95	2	Ts	LL	16.4065	9	1
96	2	Ts	LL	33.0956	13	1
97	2	Ts	LL	19.5779	12	0
98	2	Ts	LL	24.492	7	0
99	2	Ts	LL	28.26	19	0
100	2	Ts	LL	28.26	21	1
101	2	Ts	HL	5.69125	5	0
102	2	Ts	HL	5.181	7	4
103	2	Ts	HL	7.51245	10	3
104	2	Ts	HL	6.9708	8	0
105	2	Ts	HL	17.8901	7	1
106	2	Ts	HL	15.4959	5	1
107	2	Ts	HL	11.5866	7	4
108	2	Ts	HL	26.3367	9	2
109	2	Ts	HL	17.8038	8	2
110	2	Ts	HL	10.048	8	2
111	2	Ts	HL	10.621	9	1
112	2	Ts	HL	18.8793	9	1
113	2	Ts	HL	29.673	15	6
114	2	Ts	HL	12.3638	14	1
115	2	Ts	HL	33.3468	9	2
116	2	Ts	HL	24.963	13	1
117	2	Ts	HL	11.775	13	1
118	2	Ts	HL	20.41	7	0
119	2	Ts	HL	19.782	19	1
120	2	Ts	HL	11.6573	21	1
1	3	Ta	LL	4.8984	8	0
2	3	Ta	LL	4.87485	7	-3
3	3	Ta	LL	2.198	11	1
4	3	Ta	LL	3.925	11	0
5	3	Ta	LL	4.239	8	0
6	3	Ta	LL	27.4593	8	1
7	3	Ta	LL	26.69	11	0
8	3	Ta	LL	34.1475	9	2
9	3	Ta	LL	16.642	17	1
10	3	Ta	LL	27.3023	15	1
11	3	Ta	LL	25.2456	15	2
12	3	Ta	LL	24.492	13	0
13	3	Ta	LL	34.9482	11	0
14	3	Ta	LL	21.4305	20	1
15	3	Ta	LL	22.1056	26	2
16	3	Ta	LL	32.4205	7	0
17	3	Ta	LL	24.963	11	1
18	3	Ta	LL	28.574	9	0
19	3	Ta	LL	23.8483	11	1
20	3	Ta	LL	17.898	8	0
21	3	Ta	HL	3.72875	9	0
22	3	Ta	HL	5.7933	6	-1
23	3	Ta	HL	5.5264	7	-1
24	3	Ta	HL	9.3258	9	2
25	3	Ta	HL	9.2316	10	-1
26	3	Ta	HL	17.7096	13	3
27	3	Ta	HL	27.632	10	2
28	3	Ta	HL	26.376	9	-1
29	3	Ta	HL	15.8099	16	0
30	3	Ta	HL	18.997	26	0
31	3	Ta	HL	23.4715	29	1
32	3	Ta	HL	17.8901	17	1
33	3	Ta	HL	21.98	11	0
34	3	Ta	HL	29.359	19	1
35	3	Ta	HL	17.6625	15	0
36	3	Ta	HL	27.6948	10	1
37	3	Ta	HL	16.5321	6	-3
38	3	Ta	HL	25.0808	7	1
39	3	Ta	HL	16.6734	9	1
40	3	Ta	HL	25.0572	10	0
41	3	Tc	LL	4.90625	13	2
42	3	Tc	LL	3.8779	12	1
43	3	Tc	LL	2.23725	13	2
44	3	Tc	LL	3.06935	13	1
45	3	Tc	LL	4.082	15	1
46	3	Tc	LL	22.6944	11	1
47	3	Tc	LL	18.7929	12	1
48	3	Tc	LL	26.5644	11	2
49	3	Tc	LL	21.2657	15	2
50	3	Tc	LL	36.424	16	0
51	3	Tc	LL	31.871	15	0
52	3	Tc	LL	14.813	14	0
53	3	Tc	LL	31.4942	23	13
54	3	Tc	LL	12.9525	23	0
55	3	Tc	LL	17.898	25	0
56	3	Tc	LL	32.97	11	0
57	3	Tc	LL	33.1113	10	0
58	3	Tc	LL	21.7681	11	2
59	3	Tc	LL	19.4523	9	0
60	3	Tc	HL	28.7075	10	0
61	3	Tc	HL	4.71	12	2
62	3	Tc	HL	5.8404	10	1
63	3	Tc	HL	4.2704	18	2
64	3	Tc	HL	4.9455	11	3
65	3	Tc	HL	7.7558	11	2
66	3	Tc	HL	17.5526	15	9
67	3	Tc	HL	25.12	12	5
68	3	Tc	HL	35.3486	8	1
69	3	Tc	HL	14.813	15	2
70	3	Tc	HL	13.188	25	-1
71	3	Tc	HL	18.0079	30	2
72	3	Tc	HL	15.9748	19	5
73	3	Tc	HL	16.8775	15	1
74	3	Tc	HL	26.6272	17	-2
75	3	Tc	HL	24.7275	16	-1
76	3	Tc	HL	24.8688	8	0
77	3	Tc	HL	34.1632	9	0
78	3	Tc	HL	8.87835	8	0
79	3	Tc	HL	22.82	9	3
80	3	Tc	HL	35.1994	12	1
81	3	Ts	LL	2.8574	6	1
82	3	Ts	LL	6.47625	9	2
83	3	Ts	LL	9.0432	11	1
84	3	Ts	LL	8.5722	9	1
85	3	Ts	LL	11.6572	8	1
86	3	Ts	LL	32.0908	6	1
87	3	Ts	LL	18.9891	9	2
88	3	Ts	LL	11.1941	11	1
89	3	Ts	LL	16.3908	9	1
90	3	Ts	LL	22.8828	9	1
91	3	Ts	LL	18.369	9	0
92	3	Ts	LL	16.014	10	1
93	3	Ts	LL	12.56	18	3
94	3	Ts	LL	23.291	15	0
95	3	Ts	LL	17.898	11	2
96	3	Ts	LL	36.267	14	1
97	3	Ts	LL	18.6516	15	3
98	3	Ts	LL	25.6224	8	1
99	3	Ts	LL	31.6512	20	1
100	3	Ts	LL	30.772	22	1
101	3	Ts	HL	2.8574	6	1
102	3	Ts	HL	6.9394	9	2
103	3	Ts	HL	9.0432	11	1
104	3	Ts	HL	8.26605	9	1
105	3	Ts	HL	17.27	9	2
106	3	Ts	HL	16.9246	6	1
107	3	Ts	HL	12.4893	9	2
108	3	Ts	HL	27.2552	11	2
109	3	Ts	HL	19.8997	9	1
110	3	Ts	HL	18.0864	9	1
111	3	Ts	HL	13.4235	9	0
112	3	Ts	HL	21.1243	9	0
113	3	Ts	HL	31.3686	18	3
114	3	Ts	HL	15.072	15	1
115	3	Ts	HL	34.854	11	2
116	3	Ts	HL	28.7153	14	1
117	3	Ts	HL	13.2115	15	2
118	3	Ts	HL	12.0105	8	1
119	3	Ts	HL	22.451	20	1
120	3	Ts	HL	13.2037	22	1
1	4	Ta	LL	6.3585	10	2
2	4	Ta	LL	5.9346	9	2
3	4	Ta	LL	3.72875	11	0
4	4	Ta	LL	6.86875	12	1
5	4	Ta	LL	4.4745	10	2
6	4	Ta	LL	28.4013	10	2
7	4	Ta	LL	27.2238	14	3
8	4	Ta	LL	34.6028	11	2
9	4	Ta	LL	17.3799	20	3
10	4	Ta	LL	28.26	16	1
11	4	Ta	LL	26.2975	17	2
12	4	Ta	LL	25.0023	15	2
13	4	Ta	LL	34.9482	12	1
14	4	Ta	LL	22.2783	23	3
15	4	Ta	LL	22.1056	30	4
16	4	Ta	LL	33.441	8	1
17	4	Ta	LL	26.3367	11	0
18	4	Ta	LL	28.9822	8	-1
19	4	Ta	LL	25.5125	12	1
20	4	Ta	LL	17.2386	9	1
21	4	Ta	HL	4.082	11	2
22	4	Ta	HL	3.768	8	2
23	4	Ta	HL	5.95815	8	1
24	4	Ta	HL	10.048	10	1
25	4	Ta	HL	10.5975	11	1
26	4	Ta	HL	18.0785	13	0
27	4	Ta	HL	28.0638	12	2
28	4	Ta	HL	26.376	12	3
29	4	Ta	HL	15.8099	16	0
30	4	Ta	HL	19.782	27	1
31	4	Ta	HL	23.9818	29	0
32	4	Ta	HL	19.0755	17	0
33	4	Ta	HL	22.82	12	1
34	4	Ta	HL	29.8928	19	0
35	4	Ta	HL	18.7772	17	2
36	4	Ta	HL	28.26	12	2
37	4	Ta	HL	16.956	8	2
38	4	Ta	HL	26.5644	8	1
39	4	Ta	HL	17.427	10	1
40	4	Ta	HL	25.7166	12	2
41	4	Tc	LL	6.3742	17	4
42	4	Tc	LL	4.239	15	3
43	4	Tc	LL	3.14	16	3
44	4	Tc	LL	7.2848	17	4
45	4	Tc	LL	5.69125	18	3
46	4	Tc	LL	23.55	13	2
47	4	Tc	LL	19.154	14	2
48	4	Tc	LL	27.1296	15	4
49	4	Tc	LL	22.608	20	5
50	4	Tc	LL	38.622	17	1
51	4	Tc	LL	32.8837	16	1
52	4	Tc	LL	15.3075	16	2
53	4	Tc	LL	31.9574	25	2
54	4	Tc	LL	13.345	22	-1
55	4	Tc	LL	19.782	28	3
56	4	Tc	LL	34.5557	15	4
57	4	Tc	LL	33.6922	17	7
58	4	Tc	LL	23.4637	15	4
59	4	Tc	LL	20.724	10	1
60	4	Tc	LL	29.673	13	3
61	4	Tc	HL	5.2752	13	1
62	4	Tc	HL	6.8138	10	0
63	4	Tc	HL	4.71	20	2
64	4	Tc	HL	6.123	14	3
65	4	Tc	HL	8.792	13	2
66	4	Tc	HL	17.8901	16	1
67	4	Tc	HL	24.6176	15	3
68	4	Tc	HL	35.9687	11	3
69	4	Tc	HL	14.6952	18	3
70	4	Tc	HL	14.13	25	0
71	4	Tc	HL	19.5936	30	0
72	4	Tc	HL	17.1444	21	2
73	4	Tc	HL	18.0158	15	0
74	4	Tc	HL	27.5535	20	3
75	4	Tc	HL	25.12	17	1
76	4	Tc	HL	26.3603	9	1
77	4	Tc	HL	35.168	11	2
78	4	Tc	HL	9.6555	12	4
79	4	Tc	HL	23.7149	10	1
80	4	Tc	HL	35.796	13	1
81	4	Ts	LL	7.1435	5	-1
82	4	Ts	LL	7.065	10	1
83	4	Ts	LL	9.1845	11	0
84	4	Ts	LL	8.2425	10	1
85	4	Ts	LL	13.2822	8	0
86	4	Ts	LL	34.1475	5	-1
87	4	Ts	LL	18.84	10	1
88	4	Ts	LL	13.188	12	1
89	4	Ts	LL	17.3014	10	1
90	4	Ts	LL	29.1235	9	0
91	4	Ts	LL	19.154	10	1
92	4	Ts	LL	17.4741	11	1
93	4	Ts	LL	14.0122	19	1
94	4	Ts	LL	24.178	15	0
95	4	Ts	LL	19.4523	12	1
96	4	Ts	LL	33.912	14	0
97	4	Ts	LL	18.997	16	1
98	4	Ts	LL	26.9412	8	0
99	4	Ts	LL	32.656	21	1
100	4	Ts	LL	33.81	23	1
101	4	Ts	HL	7.1435	5	-1
102	4	Ts	HL	8.1954	9	0
103	4	Ts	HL	9.1845	12	1
104	4	Ts	HL	9.106	10	1
105	4	Ts	HL	17.6625	9	0
106	4	Ts	HL	17.27	5	-1
107	4	Ts	HL	12.8269	10	1
108	4	Ts	HL	28.2286	11	0
109	4	Ts	HL	20.41	10	1
110	4	Ts	HL	19.1697	9	0
111	4	Ts	HL	14.444	9	0
112	4	Ts	HL	21.98	9	0
113	4	Ts	HL	30.772	19	1
114	4	Ts	HL	14.3655	15	0
115	4	Ts	HL	36.9892	12	1
116	4	Ts	HL	19.468	14	0
117	4	Ts	HL	12.3638	16	1
118	4	Ts	HL	22.0428	8	0
119	4	Ts	HL	24.021	21	1
120	4	Ts	HL	14.13	23	1
1	5	Ta	LL	7.96775	11	1
2	5	Ta	LL	8.51725	11	2
3	5	Ta	LL	6.08375	12	1
4	5	Ta	LL	7.6302	14	2
5	5	Ta	LL	6.47625	11	1
6	5	Ta	LL	29.7908	11	1
7	5	Ta	LL	28.1658	15	1
8	5	Ta	LL	35.6626	13	2
9	5	Ta	LL	17.8038	20	0
10	5	Ta	LL	29.0136	17	1
11	5	Ta	LL	27.6242	18	1
12	5	Ta	LL	25.905	17	2
13	5	Ta	LL	35.6076	12	0
14	5	Ta	LL	23.6285	24	1
15	5	Ta	LL	22.9612	30	0
16	5	Ta	LL	33.912	9	1
17	5	Ta	LL	26.3367	12	1
18	5	Ta	LL	30.5208	11	3
19	5	Ta	LL	25.5125	13	1
20	5	Ta	LL	18.4946	10	1
21	5	Ta	HL	4.2861	11	0
22	5	Ta	HL	7.7558	9	1
23	5	Ta	HL	7.1435	10	2
24	5	Ta	HL	10.362	12	2
25	5	Ta	HL	11.9242	13	2
26	5	Ta	HL	18.84	14	1
27	5	Ta	HL	27.9774	14	2
28	5	Ta	HL	27.3415	14	2
29	5	Ta	HL	16.8382	20	4
30	5	Ta	HL	19.782	28	1
31	5	Ta	HL	25.3869	39	10
32	5	Ta	HL	19.8605	18	1
33	5	Ta	HL	23.6756	14	2
34	5	Ta	HL	29.8928	21	2
35	5	Ta	HL	19.9704	19	2
36	5	Ta	HL	29.045	13	1
37	5	Ta	HL	17.27	10	2
38	5	Ta	HL	26.5644	11	3
39	5	Ta	HL	17.898	13	3
40	5	Ta	HL	27.004	14	2
41	5	Tc	LL	8.2896	21	4
42	5	Tc	LL	6.31925	17	2
43	5	Tc	LL	5.495	19	3
44	5	Tc	LL	7.3005	20	3
45	5	Tc	LL	7.05715	21	3
46	5	Tc	LL	23.9425	18	5
47	5	Tc	LL	20.41	16	2
48	5	Tc	LL	28.0795	22	7
49	5	Tc	LL	22.9612	19	-1
50	5	Tc	LL	39.2657	22	5
51	5	Tc	LL	33.3468	24	8
52	5	Tc	LL	16.485	20	4
53	5	Tc	LL	32.97	15	-10
54	5	Tc	LL	14.287	30	8
55	5	Tc	LL	19.782	32	4
56	5	Tc	LL	35.6076	15	0
57	5	Tc	LL	34.1475	14	-3
58	5	Tc	LL	24.335	18	3
59	5	Tc	LL	21.5482	15	5
60	5	Tc	LL	30.2225	16	3
61	5	Tc	HL	6.3585	16	3
62	5	Tc	HL	8.007	18	8
63	5	Tc	HL	6.7824	22	2
64	5	Tc	HL	10.0166	17	3
65	5	Tc	HL	11.2647	15	2
66	5	Tc	HL	19.0755	19	3
67	5	Tc	HL	26.0227	18	3
68	5	Tc	HL	36.424	16	5
69	5	Tc	HL	16.642	20	2
70	5	Tc	HL	14.601	30	5
71	5	Tc	HL	20.9202	29	-1
72	5	Tc	HL	18.212	17	-4
73	5	Tc	HL	18.369	14	-1
74	5	Tc	HL	28.0638	17	-3
75	5	Tc	HL	26.0227	18	1
76	5	Tc	HL	27.3023	13	4
77	5	Tc	HL	36.2278	14	3
78	5	Tc	HL	9.97735	7	-5
79	5	Tc	HL	24.5862	10	0
80	5	Tc	HL	36.738	8	-5
81	5	Ts	LL	8.7135	9	4
82	5	Ts	LL	8.478	14	4
83	5	Ts	LL	10.99	13	2
84	5	Ts	LL	10.5975	10	0
85	5	Ts	LL	15.4488	11	3
86	5	Ts	LL	35.325	8	3
87	5	Ts	LL	19.782	11	1
88	5	Ts	LL	13.4628	12	0
89	5	Ts	LL	17.898	10	0
90	5	Ts	LL	28.574	11	2
91	5	Ts	LL	19.6328	10	0
92	5	Ts	LL	17.8038	13	2
93	5	Ts	LL	16.328	19	0
94	5	Ts	LL	24.5234	17	2
95	5	Ts	LL	20.1117	14	2
96	5	Ts	LL	34.069	17	3
97	5	Ts	LL	20.4885	18	2
98	5	Ts	LL	28.1658	10	2
99	5	Ts	LL	33.6765	22	1
100	5	Ts	LL	34.383	26	3
101	5	Ts	HL	9.00395	7	2
102	5	Ts	HL	8.949	10	1
103	5	Ts	HL	11.5395	13	1
104	5	Ts	HL	9.42	10	0
105	5	Ts	HL	18.055	10	1
106	5	Ts	HL	17.6625	7	2
107	5	Ts	HL	14.13	10	0
108	5	Ts	HL	29.673	13	2
109	5	Ts	HL	21.352	13	3
110	5	Ts	HL	21.352	12	3
111	5	Ts	HL	15.4488	11	2
112	5	Ts	HL	22.608	12	3
113	5	Ts	HL	32.5304	20	1
114	5	Ts	HL	16.5478	16	1
115	5	Ts	HL	36.9892	14	2
116	5	Ts	HL	29.202	17	3
117	5	Ts	HL	14.8365	18	2
118	5	Ts	HL	22.451	10	2
119	5	Ts	HL	24.178	24	3
120	5	Ts	HL	15.3232	25	2
Ta - Tubastraea aurea
Tc - Tubastraea coccinea
Ts - Tubastraea sp.
HL - High light
LL - Low light
